# Supplementary material
Source: publisher figshare collection journal article supplement (https://karger.figshare.com/ndownloader/files/14367119)
Supplement: Supplementary file 1 [file 14367119]

## Literature search on Quality of life and Hidradenitis Suppurativa- Search strategy

Performed by information specialist Penille Pless

The databases Pubmed, Embase, Cinahl, and Web of Science was searched January 19, 2015

### Pubmed

Search terms: quality of life, value of life, health behaviour, activities of daily living, sickness impact profile, attitude to health, health status indicators, pain measurement, pain management, pain, sick role, patient dropout, illness behaviour, depression, motor activity, physical activity, sexual dysfunction, psychology, social functioning, stereotyping, stigmatization, comorbidity, acclimatization, adaption, behaviour, career choice AND Verneuil's disease OR hidradenitis suppurativa

Free-text result                      223 items found

Search terms: social adjustment, psychology, motor activity, anti-depressive agents, depression, illness behaviour, patient dropouts, sick role, health status indicators, attitude to health, sickness impact profile, activities of daily living, life style, health behaviour, value of life, quality of life, pain, pain management, pain measurement, treatment outcome, sexual dysfunctions, psychological, career choice, AND Verneuil's disease OR hidradenitis suppurativa

MESH result                              23 items found

### Cinahl

Search terms : Quality of life, life purpose, health behaviour, patient compliance, treatment refusal, life style, activities of daily living, sickness impact profile, attitude to health or attitude to illness, health status indicators, pain measurement, pain management, pain, sick role, patient attitudes, depression, motor activity, physical activity, sexual dysfunction male/female, psychology, social behaviour, social interaction, stereotyping or stigma, comorbidity, acclimatization, behaviour, treatment outcomes or treatment failure, hidradenitis suppurativa

Result                                      16 items found

### Web of Science – all databases

|                                |              |
|--------------------------------|--------------|
| 1 Hidradenitis suppurativa     | 1.339        |
| 2 quality of life              | 464.217      |
| 3 1 and 2                      | 101          |
| 4 1 and 2 refined by databases | 95 (MEDLINE) |

## **Embase**

Search terms : Quality of life, quality of working life, disease management, lifestyle, lifestyle and related phenomena, lifestyle modification, attitude to health, attitude, attitude to illness, daily life activity, pain, health status indicator, pain assessment, patient attitude, patient dropouts, illness behaviour, depression, motor activity, physical activity, sexual dysfunction, psychology, exp. Social interaction or social behaviour, stereotyping, comorbidity, acclimatization or adaptation, behaviour, exp treatment outcome, exp suppurativa hidradenitis

Result

116 items found
